# Supplementary material
Source: MDPI journal article supplement (https://www.mdpi.com/1999-4907/13/8/1337)
Supplement: s1 [file s1]

>5'UTR of c183227.graph\_c0

TTTATTTTTATTTTTATTTTTTTTTATCGTAATCATCACAGCATTGTCGCCCTTTTGCTCTCAGAG  
ATATTATTCCTAGTAGTCCTACGATATCCCTATTTACATGCCAGAACTCGCCATTTTACGGTGTT  
GAAGCTGCTGTAAGTAGTGTTAAGCAGGCTTGGCAGACAGATAGTTTGGTTTTTCATG

>5'UTR of c193143.graph\_c1

CGTGCACATTTAGCTTTGCTTGACTTGAGTCAGTTGATTTGAGTAACACATACTTAAGAATG

>c215396.graph\_c0 CDS of MYB

ATGGCGAACAGATCTTTGTGGGGAGGTTCAGACTTTGATTATGAGAACGAAGCCGATACGAGG  
AAGGGTCCATGGACTGTGGAAGAGGACATGCAGCTTATTGGTATTGTAAATTTGCACGGAGAA  
GGACGCTGGACCTTTCTCGCCAGAGCATCTGGCCTCCAGAGAACTGGTAAGAGCTGCCGGCTA  
AGGTGGGTAACTATCTCCGGCCTGATCTCAAGCGGAGCAAGATCACTCCTGAAGAAGAACGTT  
TGATTATTGAACTCCATCGCCGTTGGGGAAATAGGTGGTCTCGTATTGCACAAAGTTTACCAGG  
AAGGACGGATAACGAAATCAAGAATTTCTGGAGAACTCGTATGAAGGGAAAAATAAATTCGGA  
AACTGATAGAGACATCGGCGGCATGCATACAGACGACGGAGTAGAGTTTGAAAGTTCAATGGG  
ATCTTGCTGCCTCCCAATTACTCCATCCGAAATACCGTCTGAGGTAGACATTGCAGAGCCTTCGA  
GTAGCTTTCCCGCCAGAAAGCCGAGGATATAACGGTCTCGACCAACACAATCCCATCTGTCCA  
AGATGATATTTCTCCTGAGGTAATCCAGATCAGTAGCGAAGGAAATTCTGAGAATGTATTGCAG  
GGCAGAGAAATTCATGGTCATTCCAACCCTAATTATGATGGGCAGCCAGGGGAAAGTAACCCG  
GAACATTTGGAAGGACCGGACAGCGTGTTTCAGAAAACCTAGGTTACCTCACACTTTCTCTGTGG  
GTTCTCTCGTAACATTACTATCCTCTGAGTTCTTTGCAGATAGCGCCATTCAAGATTGCAAAATAT  
CGCCTCTTTCCTCCTATGTGGCAGCTTCGCCGGAGGCTGTCTCCGATAGCGAAATTTACTTGTCT  
TGTTATTCGGATGTATTATGGAACATGGATGAAGAAGATAACCGTTGCTTTCGCAGTTGGCAATC  
CGCAGAGGATACGCGATTATATTGA
